# Supplementary material for: Impact of ELN clinical signs and symptoms on the thrombotic risk in Polycythemia Vera patients treated with front-line hydroxyurea
Source: Research Square preprint supplement (doi:10.21203/rs.3.rs-6252512/v1), 2025-03-31
Supplement: Supplementary file 1 [file 1529807d42ecd2564ebddebb.pdf]

Supplemental Figure 1: Patients' Disposition

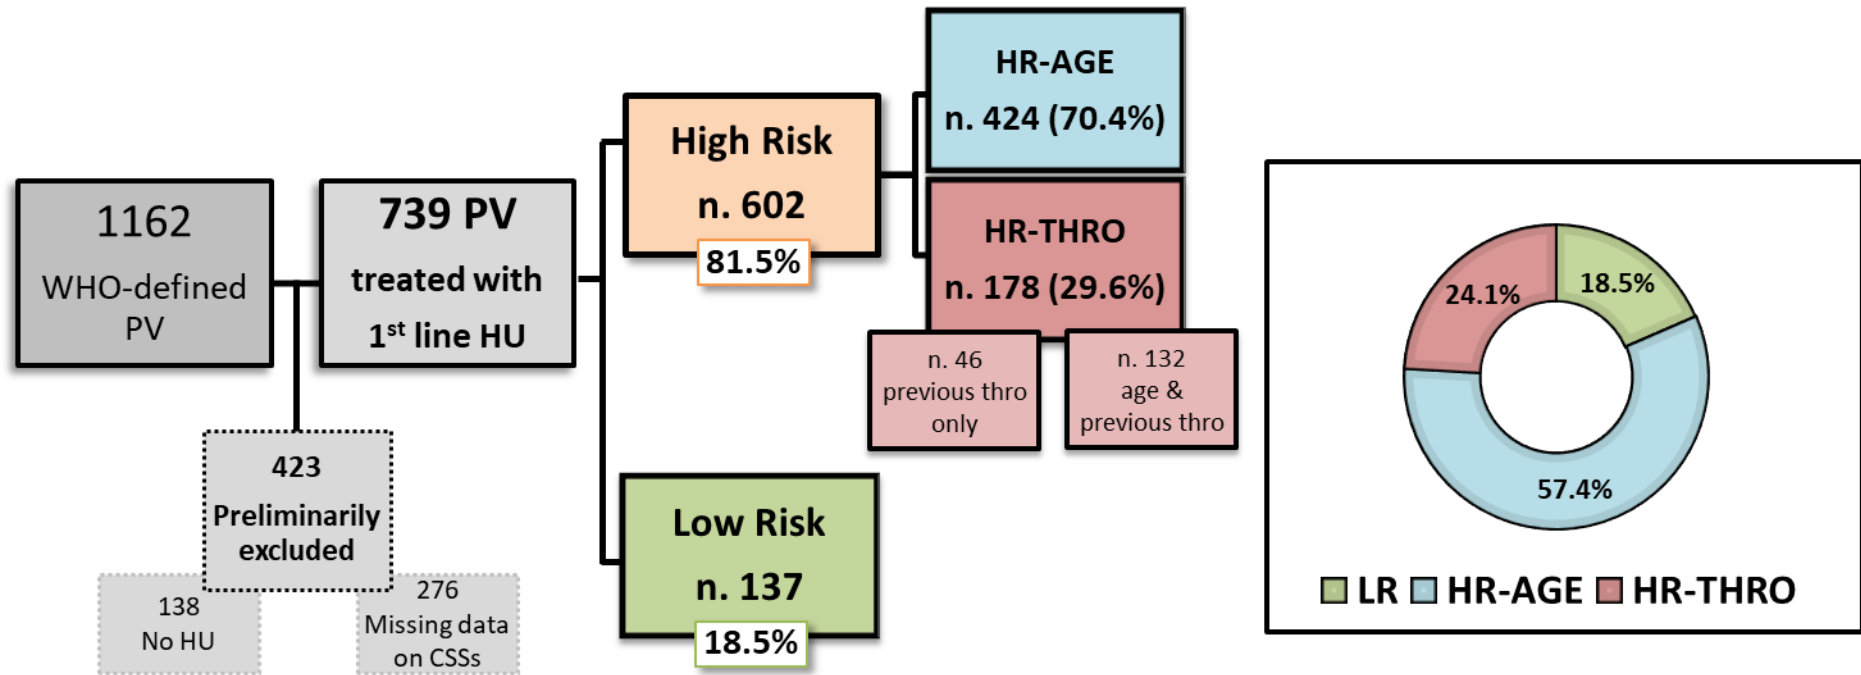

Supplemental Figure 1: WHO, World Health Organization; PV, Polycythemia Vera; HU, hydroxyurea; CSSs, Clinical Signs and Symptoms; HR-THRO, high-risk for previous thrombosis; HR-AGE, high-risk for age >60 years

Supplemental Table 1: Distribution of Additional Reasons to start hydroxyurea in patients without Clinical Signs and Symptoms.

|                                                | LR<br>(n. 42) | HR<br>(n. 252)     |                    | p-value<br>(LR vs. HR) |
|------------------------------------------------|---------------|--------------------|--------------------|------------------------|
|                                                |               | HR-AGE<br>(n. 183) | HR-THRO<br>(n. 69) |                        |
| Palpable Spleen (2-5 cm BCM), n. (%)           | 8 (19.1%)     | 28 (11.1%)         |                    | 0.15                   |
|                                                |               | 16 (8.7%)          | 12 (17.4%)         |                        |
| Microvascular Disturbances, n. (%)             | 24 (57.1%)    | 195 (77.4%)        |                    | <b>0.004</b>           |
|                                                |               | 148 (80.9%)        | 48 (69.6%)         |                        |
| Mild Leukocytosis*, n. (%)                     | 13 (31.0%)    | 64 (25.4%)         |                    | 0.45                   |
|                                                |               | 46 (25.1%)         | 18 (26.1%)         |                        |
| Mild Thrombocytosis°, n. (%)                   | 31 (73.8%)    | 145 (57.5%)        |                    | <b>0.05</b>            |
|                                                |               | 112 (61.2%)        | 33 (47.8%)         |                        |
| Intermediate phlebotomies requirement§, n. (%) | 21 (50.0%)    | 89 (35.3%)         |                    | 0.13                   |
|                                                |               | 68 (37.2%)         | 21 (30.4%)         |                        |

Supplemental Table 1: LR: low-risk (age <60 years and no previous thrombosis). HR: High-risk (age ≥60 years and/or a history of thromboembolism). HR-AGE (age ≥60 years). HR-THRO (previous thrombosis, regardless of age); \*defined as leukocytes count >11 x10<sup>9</sup>/L at hydroxyurea start but not meeting CSS criteria; °defined as platelet count >450 but <1000 x10<sup>9</sup>/L at hydroxyurea start; § defined as ≥3 phlebotomies in the 12 months before hydroxyurea start.

Supplemental Table 2: Type and Incidence of Thromboses during treatment with hydroxyurea

|                                                                             | Number of events | Number of patients (%) | Incidence rate, per 100 patient-years |
|-----------------------------------------------------------------------------|------------------|------------------------|---------------------------------------|
| <b>Overall Thromboses</b>                                                   | 92               | 72 (9.7%)              | 2.02                                  |
| <b><i>Venous Thromboembolisms</i></b>                                       | 47               | 40 (5.4%)              | 1.03                                  |
| <i>Deep vein thrombosis of the limbs with or without pulmonary embolism</i> | 10               | 10 (1.4%)              | 0.22                                  |
| <i>Superficial vein thrombosis of the limbs</i>                             | 27               | 20 (2.8%)              | 0.44                                  |
| <i>Pulmonary thromboembolic events</i>                                      | 6                | 6 (0.8%)               | 0.13                                  |
| <i>Splanchnic venous thrombosis</i>                                         | 3                | 3 (0.4%)               | 0.065                                 |
| <i>Retinal venous thrombosis</i>                                            | 1                | 1 (0.1%)               | 0.022                                 |
| <b><i>Arterial Thromboses</i></b>                                           | 45               | 40 (5.4%)              | 0.99                                  |
| <i>Acute myocardial infarction</i>                                          | 18               | 16 (2.2%)              | 0.39                                  |
| <i>Ischemic stroke</i>                                                      | 11               | 11 (1.5%)              | 0.24                                  |
| <i>Transient ischemic attack</i>                                            | 10               | 10 (1.4%)              | 0.22                                  |
| <i>Splanchnic arterial thrombosis</i>                                       | 6                | 3 (0.4%)               | 0.065                                 |

Supplemental Figure 2: Thrombosis-free survival comparison between patients with at least one CSS (dashed line) and patients without CSSs (continuous line) across all the risk categories.

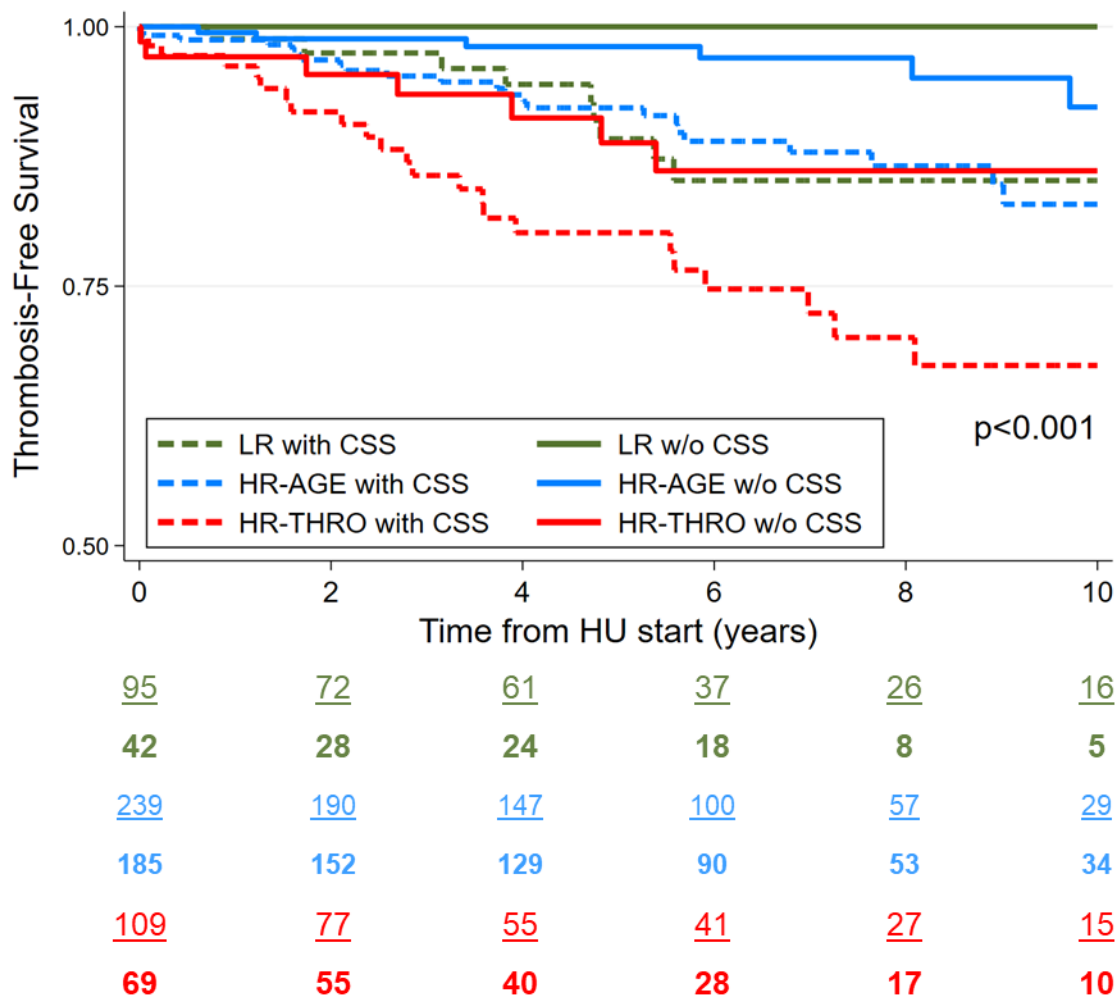

Supplemental Figure 2: LR, Low Risk; HR-AGE, High Risk for age>60; HR-THRO, High Risk for previous thrombosis; CSS: Clinical Signs and Symptoms; w/o, without
